# Supplementary material for: Accurate quantification of homologous recombination in zebrafish: brca2 deficiency as a paradigm
Source: PubMed Central journal article supplement (PMC5705637; doi:10.1038/s41598-017-16725-3), 2017-11-28

# SUPPLEMENTARY INFORMATION

## Accurate quantification of homologous recombination in zebrafish: brca2 deficiency as a paradigm

Jeroen Vierstraete<sup>1,2</sup>, Andy Willaert<sup>1</sup>, Petra Vermassen<sup>1</sup>, Paul J. Coucke<sup>1</sup>, Anne Vral<sup>2</sup>, Kathleen BM. Claes<sup>1\*</sup>

<sup>1</sup>Center for Medical Genetics Ghent, Ghent University Hospital

<sup>2</sup>Department for Basic Medical Sciences, Ghent University

\*Corresponding author

E-mail: Kathleen.Claes@UGent.be

**Supplementary Table 1: Mutation and primers used for genotyping**

| Line                            | Mutation                                   | Forward                       | Reverse                      |
|---------------------------------|--------------------------------------------|-------------------------------|------------------------------|
| <i>brca2</i> <sup>hg5</sup>     | <i>c.1972C&gt;T</i><br>p.Q658X<br>exon 11  | 5'-CAAGTCAACGTCTATCACAACC-3'  | 5'-TGATGACTCTGAACTTCTCCC-3'  |
| <i>brca2</i> <sup>sa22682</sup> | <i>c.4006C&gt;T</i><br>p.Q1336X<br>exon 11 | 5'-TCTAGCTCCTCAGGGAAGCA-3'    | 5'-AGGTTTCATGGTCCTTTGCAG-3'  |
| <i>brca2</i> <sup>cmg35</sup>   | <i>c.534del13</i><br>p.V178fs<br>exon 8    | 5'-TGTAGTAGGCTAAGCAAATACGG-3' | 5'-CAGAGTCCTTTGAGAGAGATGG-3' |

**Supplementary Table 2: PCR reaction mix**

| PCR component             | volume/reaction (μl) |
|---------------------------|----------------------|
| Kapa2G Robust MM (2x)     | 10                   |
| Forward primer (10μM)     | 0.6                  |
| Reverse primer (10μM)     | 0.6                  |
| H <sub>2</sub> O          | 7.8                  |
| Dissolved G-block         | 1                    |
| Total volume/PCR reaction | 20                   |

**Supplementary Table 3: PCR primers**

|                |                               |
|----------------|-------------------------------|
| Forward primer | 5'-CCGCTAGCTAATACGACTCACTA-3' |
| Reverse primer | 5'-AAAAGCACCGACTCGGTG-3'      |

**Supplementary Table 4: PCR program**

|       |        |                    |
|-------|--------|--------------------|
| 94° C | 4 min  |                    |
| 94° C | 30 sec | 6 X<br>(touchdown) |
| 58° C | 30 sec |                    |
| 72° C | 1 min  |                    |
| 94° C | 40 sec | 25 X               |
| 52° C | 40 sec |                    |
| 72° C | 30 sec |                    |
| 72° C | 10 min |                    |

**Supplementary Table 5: Time kinetics experiment**

|    | Mean number of Rad51 foci/cell |               |              |
|----|--------------------------------|---------------|--------------|
|    | 10Gy (95% CI)                  | 20Gy (95% CI) | 0Gy (95% CI) |
| 1h | 4.49 ± 0.81                    | 4.71 ± 1.2    |              |
| 3h | 4.57 ± 0.85                    | 4.68 ± 0.87   |              |
| 5h | 3.87 ± 0.99                    | 5.41 ± 1.47   | 0.54 ± 0.21  |
| 7h | 3.88 ± 0.56                    | 6.33 ± 2.56   |              |
| 9h | 3.23 ± 0.8                     | 5.64 ± 1.49   | 0.4 ± 0.2    |

**Supplementary Table 6: Comparison of quantification**

| Dose | Hypothesised value (95% CI) | True value (95% CI) |
|------|-----------------------------|---------------------|
| 20Gy | 6.14 ± 1.36                 | 6.06 ± 1.35         |
| 0Gy  | 0.67 ± 0.07                 | 0.47 ± 0.04         |

**Supplementary Table 7: Comparing the amount of Rad51 foci/cell between different genotypes for three mutations and combined**

|                             | Mean number of Rad51 foci/cell |                                 |                               |             |
|-----------------------------|--------------------------------|---------------------------------|-------------------------------|-------------|
|                             | <i>brca2</i> <sup>hg5</sup>    | <i>brca2</i> <sup>sa22682</sup> | <i>brca2</i> <sup>cmg35</sup> | Combined    |
| <i>brca2</i> <sup>+/+</sup> | 5.58 ± 0.83                    | 6.1 ± 0.22                      | 6.05 ± 0.81                   | 5.70 ± 0.39 |
| <i>brca2</i> <sup>+/-</sup> | 5.09 ± 0.72                    | 5.2 ± 0.76                      | 4.39 ± 0.59                   | 4.95 ± 0.43 |
| <i>brca2</i> <sup>-/-</sup> | 0.18 ± 0.14                    | 0.12 ± 0.08                     | 0.13 ± 0.06                   | 0.15 ± 0.05 |

**Supplementary Fig S1:  $\gamma$ H2AX staining.** Unirradiated (upper) and irradiated (lower) gut section of 72 hpf embryo. Dose administered was 20 Gy, followed by fixation at 5 hpi.

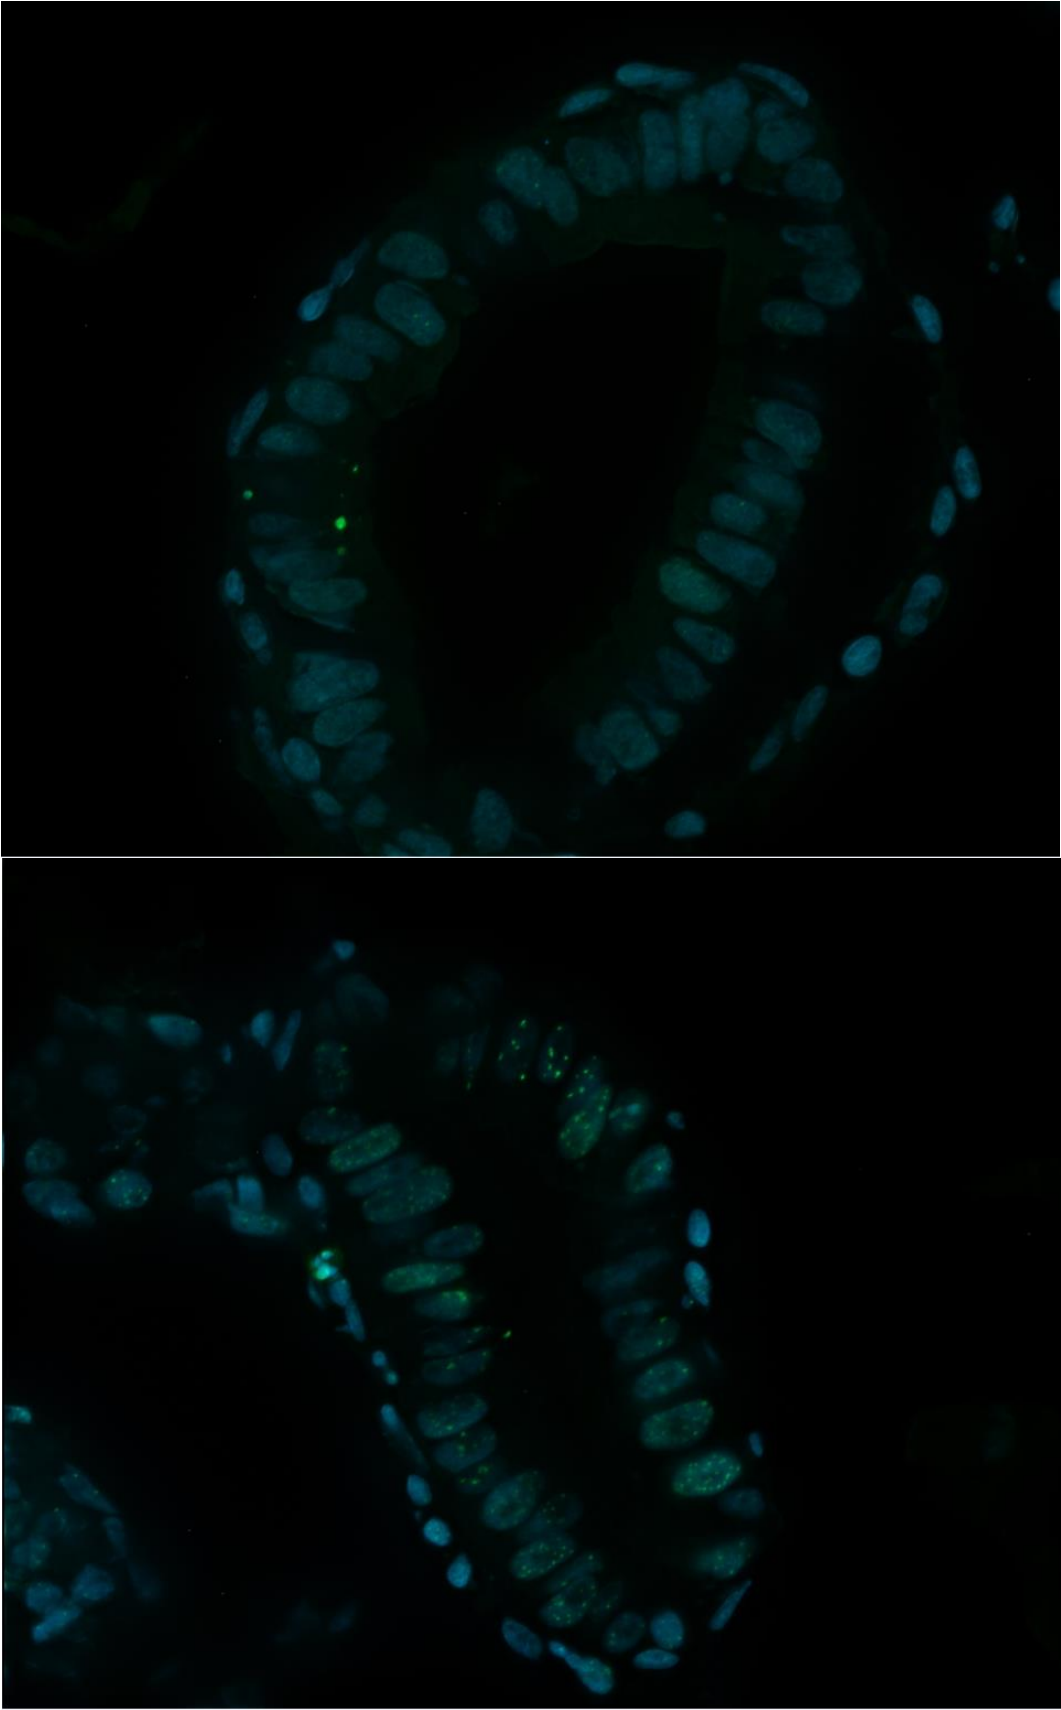

**Supplementary Fig S5: Result of comparing quantification methods.** Foci were either quantified according to the method used in the time kinetics experiment (hypothesised value) or by counting the mean number of foci in the geminin positive cells (true value). Values show Rad51 foci/cell  $\pm$  95% CI.

Comparison of quantification

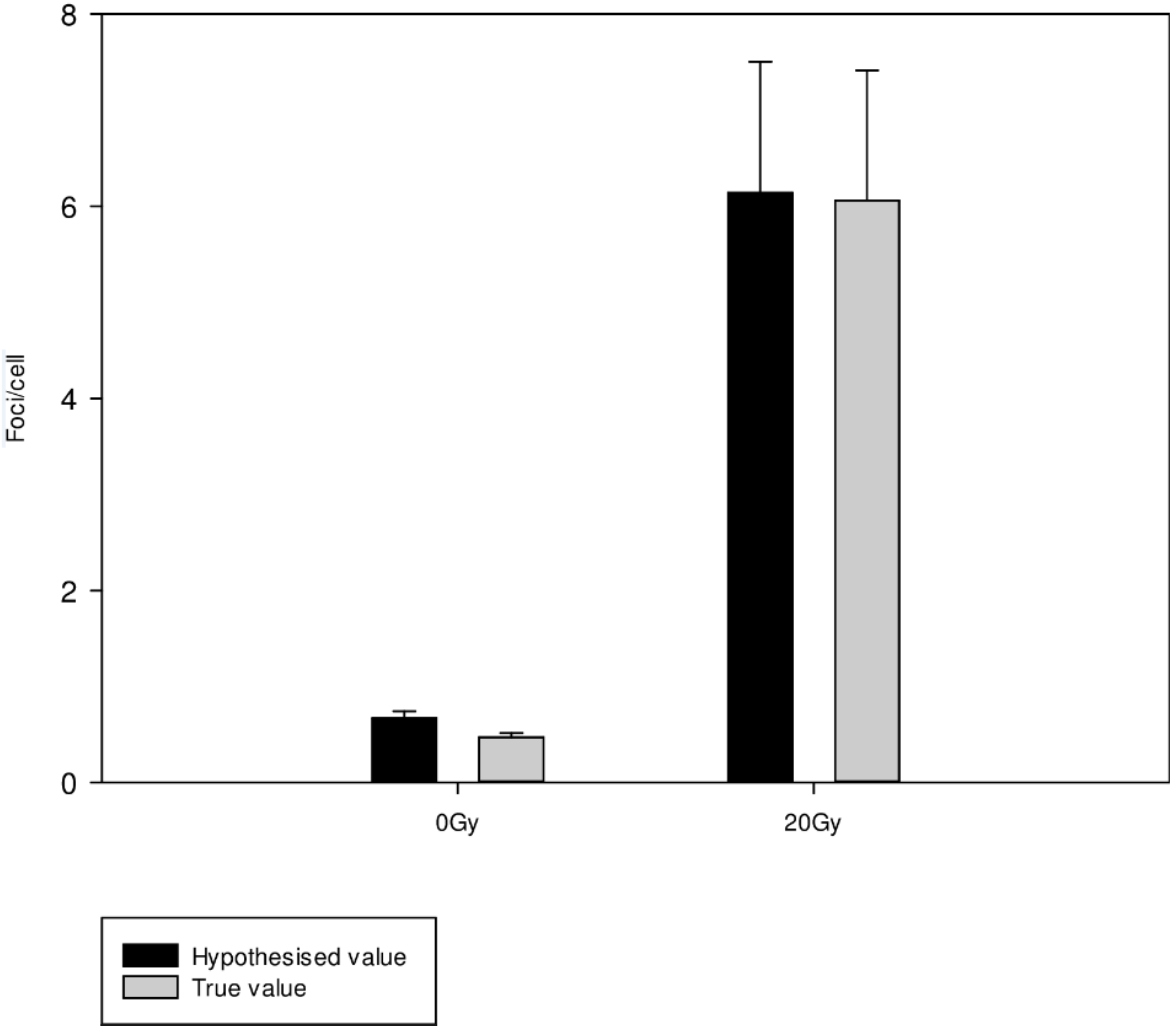

Supplement: 41598_2017_16725_MOESM1_ESM.pdf [file 41598_2017_16725_MOESM1_ESM.pdf]
